# Supplementary material for: Aldol-type carbon bond formation of ethereal oxonium ylide
Source: Royal Society of Chemistry journal article supplement (doi:10.1039/b102248m), 2001-01-01
Supplement: b102248m.doc [file b102248m.doc]

**Supplementary Information-I**

**Experimental and Spectroscopic Data.**

**General.**

Chemical shifts of 1H NMR (500 MHz) and 13C NMR (126 MHz) spectra are expressed in ppm using residual CHCl3 ( 7.26) and CDCl3 (77.0), respectively, as the internal standards. Flash column chromatography was performed using silica gel (Wakogel C-300) and a mixed eluent of AcOEt in hexane (normally 50:50). To separate and purify some products which are unstable on silica gel, chromatography by LC-908 (JAI) equipped with a polymer gel GPC column (JAIGEL 1H, carrier CHCl3) was performed. Reaction solvents were dried and distilled before use.

**Preparation of diazoketones 1a-b.**

2-(3-Diazo-2-oxopropyl)-2-methyldioxolane **1a** and 2-(3-diazo-1,1-dimethyl-2-oxopropyl)-2-methyldioxolane **1b** were prepared by the methods reported.4b Their spectral data are as follows.

**2-(3-Diazo-2-oxopropyl)-2-methyldioxolane (1a):** See reference 4b.

**2-(3-Diazo-1,1-dimethyl-2-oxopropyl)-2-methyldioxolane (1b):** 1H NMR (500 MHz, CDCl3)1.19 (6H, s), 1.26 (3H, s), 3.94 - 4.00 (4H, m), 5.79 (1H, s); 13C NMR (75.6 MHz, CDCl3)20.5, 20.7, 54.3, 54.5, 65.0, 111.3, 198.1; IR (liquid film) 2100 (s),1630 (s) cm-1 .

**General procedure of Rh(2)-catalyzed reaction of 1 with aromatic aldehyde.**

To a CH2Cl2 solution of Rh2(OAc)4 (1mol% to 1), aldehyde (3 equiv) and TMSCl (3 equiv) was added a CH2Cl2 solution of diazoketone **1** (0.54 mmol) under N2 atmosphere. After stirring the mixture for 120 min, excess amount (vs TMSCl) of triethylamine was added and the reaction mixture was washed with saturated aqueous NaHCO3. After drying over anhydrous MgSO4, solvent was removed under reduced pressure. When hexane was added to the residue, unreacted aldehyde was precipitated and removed by decantation. Mother liquid was again concentrated in vacuo and the residue was chromatographed on a silica gel flash column to isolate products.

**1, 8, 8-Trimethyl-2,5-dioxabicyclo[4,2,0]octan-7-one** (**2b**): 1H NMR 1.08 (3H, s), 1.15 (3H, s), 1,47 (3H, s), 3.55 - 3.60 (2H, m) 3.70 - 3.75 (1H, m), 3.83 - 3.88 (1H, m), 4.73 (1H, s); 13C NMR 14.3, 14.8, 21.3, 59.3, 60.7, 62.9, 71.4, 84.3, 211.7.

**8,8-Dimehthyl-7-exomethylene-3,6-dioxocan-1-one (4)**: 1H NMR 1.31 (6H, s), 3.77 (2H, m), 4.12 (2H, m), 4.54 (2H, d, *J* = 2.5 Hz), 4.61 (2H, d, *J* = 2.5 Hz); 13C NMR 24.1, 51.5, 71.9, 73.4, 77.6, 91.5, 169.5, 212.0; HRMS (EI) calcd for C9H14O3 (M+) 170.0943, found 170.0947.

**4-(2-Chloroethoxy)-4,5,5-trimethyl-3-oxacyclopentanone** (**5**): 1H NMR 1.05 (3H, s), 1.07 (3H, s), 1.40 (3H, s), 3.56 (1H, t, *J* = 5.4 Hz), 3.57 (1H, t, *J* = 5.7 Hz), 3.70-3.82 (2H, m), 3.95 (1H, d, *J* = 16.5 Hz), 4.11 (1H, d, *J* = 16.5 Hz); 13C NMR 15.7, 15.8, 21.6, 43.1, 51.6, 61.6, 67.4, 109.3, 217.3.

**2-[Hydroxy(4-nitrophenyl)methyl]-8,8-dimethyl-7-methylene-3,6-dioxocan-1-one** (**6d**): anti-isomer: 1H NMR 1.24 (3H, s, Me), 1.33 (3H, s, Me), 2.78 (1H, d, *J* = 5.0 Hz, OH), 3.51 - 3.56 (1H, m, OCH2), 3.63 - 3.67 (1H, m, OCH2), 3.98 (1H, d, *J* = 8.5 Hz, OCH(CO)), 3.97 - 4.06 (2H, m, OCH2), 4.55 (1H, d, *J* = 2.5 Hz, =CH2), 4.77 (1H, d, *J* = 2.5 Hz, =CH2), 5.11 (1H, dd, *J* = 5.0, 8.5 Hz, ArCH(OH)), 7.60 (2H, d, *J* = 8.5 Hz), 8.20 (2H, d, *J* = 8.5 Hz); 13C NMR 21.5, 21.9, 53.9, 69.7, 70.2, 71.7, 84.5 (C-OH), 94.3 (O-C-CO), 123.2 (*o-*), 127.7 (*m-*), 147.5 (*p-*), 148.2 (*ipso*), 164.0 (C=CH2), 209.1 (C=O); HRMS (EI) calcd for C16H19NO6 (M+) 321.1212, found 321.1197.

**2-[Hydroxy(4-nitorophenyl)methyl]-4-(2-chloroethoxy)-4,5,5-trimethyl-3-oxacyclopentanone** (**7d**): anti-isomer: 1H NMR 0.90 (3H, s), 1.08 (3H, s), 1.36 (3H, s), 3.45 (1H, broad), 3.54 (2H, t, *J* = 5.4 Hz), 3.62 - 3.76 (2H, m), 4.12 (1H, d, 7.0 Hz), 4.96 (1H, d, *J* = 7.0 Hz) 7.58 (2H, d, *J* = 8.7 Hz), 8.22 (2H, d, *J* = 8.7 Hz); 13C NMR 15.8, 16.7, 21.6, 43.1, 52.2, 61.8, 72.8, 79.3, 108.3, 123.3, 127.8, 146.3, 147.7, 218.6; HRMS(CI) calcd for C16H21 N O6Cl (MH+) 358.1056, found 358.1034.

**2-[Hydroxy(4-cyanophenyl)methyl]-8,8-dimethyl-7-methylene-3,6-dioxocan-1-one (6e):** anti-isomer: 1H NMR (500 MHz, CDCl3) 1.22 (3H, s, Me), 1.32 (3H, s, Me), 2.81 (1H, d, broad, OH), 3.46 - 3.57 (1H, m, OCH2), 3.62 - 3.66 (1H, m, OCH2), 3.93 - 3.99 (1H, m, OCH2), 3.96 (1H, d, *J* = 8.4 Hz, OCH(CO)), 4.00 - 4.06 (1H, m, OCH2), 4.55 (1H, d, *J* = 2.5 Hz, =CH2), 4.77 (1H, d, *J* = 2.5 Hz, =CH2), 5.05 (1H, dd, *J* = 8.4 Hz, ArCH(OH)), 7.53 (2H, d, *J* = 8.4 Hz), 7.64( 2H, d, *J* = 8.4 Hz); 13C NMR 21.5, 21.9, 53.9, 69.6, 70.2, 71.9, 84.4 (-C(OH), 94.3 (-OCCO-), 111.5 (*ipso*), 118.7 (CN), 127.6 (*m-*), 131.8 (*o-*), 146.3 (*p-*), 164.1 (CH2=C), 209.1 (C=O); HRMS(CI) calcd for C17H19NO4 (M+) 301.1313, found 301.1310.

**2-[Hydroxy(4-cyanophenyl)methyl]-4-(2-chloroethoxy)-4,5,5-trimethyl-3-oxacyclopentanone (7e)**: anti-isomer: 1H NMR (500 MHz, CDCl3): 0.86 (3H, s), 1.07 (3H, s), 1.36 (3H, s), 3.35 (1H, broad s), 3.53 - 3.55 (2H, t, *J* = 5.4 Hz), 3.63 - 3.76 (2H, m), 4.12 (1H, d, *J* = 6.6 Hz), 4.91 (1H, d, *J* = 6.6 Hz), 7.52 (2H, d, *J* = 8.1 Hz), 7.65 (2H, d, *J* = 8.1 Hz); 13C NMR 15.9, 16.8, 21.5, 43.2, 52.2, 61.9, 73.1, 79.4, 108.3, 112.0, 118.7, 127.8, 132.0, 144.4, 218.6; HRMS(CI) calcd for C17H21ClNO4 (MH+) 338.1158, found 38.1140.

**2-[Hydroxy(4-methoxyphenyl)methyl]-8,8-dimethyl-7-methylene-3,6-dioxocan-1-one** (**6f**): syn-isomer (?): 1H NMR 1.18 (3H, s), 1.30 (3H, s), 2.70 (1H, m), 3.54-3.77 (2H, m), 3.81 (3H, s), 3.97-4.06 (3H, m including *J* = 8.1 Hz), 4.55 (1H, d, *J* = 2.5 Hz), 4.75 (1H, d, *J* = 2.5 Hz), 4.94-4.96 (1H, m), 6.88 (2H, d, *J* = 8.6 Hz), 7.31 (2H, d, *J* = 8.6 Hz); 13C NMR 21.6, 22.0, 53.9, 55.2, 69.7, 70.7, 72.8, 84.5, 94.0,113.6, 128.0, 132.8, 159.2, 164.8, 210.1; anti-isomer (?): 1H NMR 0.54 (3H, s), 1.51 (3H, s), 2.99 (1H, s), 3.78 (3H, s), 3.96 (1H, d, *J* = 8.6 Hz), 4.02-4.12 (4H, m), 4.56 (1H, d, *J* = 2.5 Hz), 4.69 (1H, d, *J* = 2.5 Hz), 4.95 (1H, d, *J* = 8.6 Hz), 6.82 (2H, d, *J* = 8.7 Hz), 7.24 (2H, d, *J* = 8.7 Hz); 13C NMR 20.1, 21.1, 53.8, 55.1, 69.2, 69.6, 72.8, 86.1, 94.1, 113.6, 128.8, 130.2, 159.4, 163.6, 207.5; Anal. Calcd for C17H22O5: C, 66.65; H, 7.24. found: C, 66.44; H, 7.27.

**2-[Hydroxy(4-methoxyphenyl)methyl]-4-[(2-chloroethyl)oxy]-4,5,5-trimethyl-3-oxacyclopentanone** (**7f**): syn-isomer: 1H NMR 0.67 (3H, s), 1.04 (3H, s), 1.32 (3H, s), 2.45-2.82 (1H, broad), 3.54 (2H, t, *J* = 5.6 Hz), 3.69-3.77 (2H, m), 3.80 (3H, s), 4.21 (1H, d, *J* = 3.3 Hz), 4.95 (1H, d, *J* = 3.3 Hz), 6.87 (2H, d, *J* = 8.7 Hz), 7.30 (2H, d, *J* = 8.7 Hz): anti-isomer: 1H NMR 0.92 (3H, s), 1.07 (3H, s), 1.41 (3H, s), 2.45-2.82 (1H, broad), 3.55 (2H, t, *J* = 3.5 Hz), 3.70-3.78 (2H, m), 3.80 (3H, s), 4.21 (1H, d, *J* = 6.0 Hz), 4.84 (1H, d, *J* = 6.0 Hz), 6.86 (2H, d, *J* = 8.5 Hz), 7.20 (2H, d, *J* = 8.5 Hz); 13C NMR 15.8, 16.0, 16.8, 17.0, 20.6, 21.0, 43.2, 51.6, 52.1, 55.2, 61.7, 61.7, 62.9, 72.0, 73.5, 80.3, 80.7, 108.2, 108.3, 113.5, 113.7, 126.6, 128.0, 128.5, 131.3, 132.5, 159.3, 159.5, 217.3, 218.6; HRMS (EI) calcd for C17H23ClO5 (M+) 342.1234, found 342.1235.

**2-[Hydroxy(phenyl)methyl]-8,8-dimethyl-7-methylene-3,6-dioxocan-1-one** (**6c**): syn-isomer (?): 1H NMR 1.16 (3H, s), 1.30 (3H, s), 2.83 (1H, m, including *J* = 5.2 Hz), 3.62-3.77 (2H, m), 3.98-4.04 (2H, m), 4.08, (1H, d, *J* = 8.0 Hz), 4.55 (1H, d, *J* = 2.0 Hz), 4.75 (1H, d, *J* = 2.0 Hz), 5.00 (1H, dd, *J1* = 8.0, *J2* = 5.2 Hz), 7.27-7.47 (5H, m): anti-isomer (?): 1H NMR 0.50 (3H, s), 1.15 (3H, s), 3.07 (1H, s, broad), 3.98 (1H, d, *J* = 8.3 Hz), 4.00-4.12 (4H, m), 4.56 (1H, d, *J* = 2.5 Hz), 4.68 (1H, d, *J* = 2.5 Hz), 5.00 (1H, d, *J* = 8.3 Hz), 7.23-7.33 (5H, m); 13C NMR 20.0, 21.2, 53.8, 69.4, 69.6, 73.3, 86.2, 94.1, 127.6, 128.2, 138.3, 138.3, 163.6, 207.5.

**2-[Hydroxy(phenyl)methyl]-4-[(2-chloroethyl)oxy]-4,5,5-trimethyl-3-oxacyclopentanone** (**7c**): syn-isomer: 1H NMR 0.91 (3H, s), 1.09 (3H, s), 1.41 (3H, s), 2.30-2.70 (1H, broad), 3.54 (2H, t, *J* = 5.0 Hz), 3.70-3.77 (2H, m), 4.27 (1H, d, *J* = 3.4 Hz), 5.02-5.04 (1H, m, including *J* = 3.4 Hz), 7.23-7.33 (5H, m): anti-isomer: 1H NMR 0.69 (3H, s), 1.05 (3H, s), 1.33 (3H, s), 2.30-2.70 (1H, broad), 3.55 (2H, t, *J* = 5.0 Hz), 3.70-3.77 (2H, m), 4.22 (1H, d, *J* = 6.1 Hz), 4.90 (1H, d, *J* = 6.1 Hz), 7.23-7.33 (5H, m).
